# Supplementary material for: Assessment of Future Precipitation Changes in Mediterranean Climate Regions from CMIP6 ensemble
Source: Copernicus journal article supplement (doi:10.5194/egusphere-2023-3057), 2024-01-05
Supplement: Supplementary file 1 [file egusphere-2023-3057-supplement.pdf]

1 **Supplementary Table S1. CMIP6 models used in the study (realisation used is r1i1p1f1 except for: CESM2 (r4i1p1f1), CNRM-**  
2 **CM6-1 (r1i1p1f2), CNRM-ESM2-1 (r1i1p1f2), HadGEM3-GC31-LL (r1i1p1f3), MIROC-ES2L (r1i1p1f2) and UKESM1-0-LL**  
3 **(r1i1p1f2)).**

|    | <b>Model</b>     | <b>Country</b>    | <b>Modeling institution</b>                                                                                                                                                                                            |
|----|------------------|-------------------|------------------------------------------------------------------------------------------------------------------------------------------------------------------------------------------------------------------------|
|    |                  |                   | Commonwealth Scientific and Industrial Research Organization (CSIRO),                                                                                                                                                  |
| 1  | ACCESS-CM2       | Australia         | Australian Research Council Centre of Excellence for Climate System Science (ARCCSS)                                                                                                                                   |
| 2  | bcc-csm2-mr      | China             | Beijing Climate Center                                                                                                                                                                                                 |
| 3  | CanESM5          | Canada            | Canadian Centre for Climate Modelling and Analysis, Environment and Climate Change Canada                                                                                                                              |
| 4  | CESM2            | USA               | National Center for Atmospheric Research (NCAR)                                                                                                                                                                        |
| 5  | CMCC-CM2-SR5     | Italy             | Fondazione Centro Euro-Mediterraneo sui Cambiamenti Climatici                                                                                                                                                          |
| 6  | CMCC-ESM2        | Italy             | Fondazione Centro Euro-Mediterraneo sui Cambiamenti Climatici                                                                                                                                                          |
| 7  | CNRM-CM6-1       | France            | Centre National de Recherches Météorologiques                                                                                                                                                                          |
| 8  | CNRM-ESM2-1      | France            | Centre National de Recherches Météorologiques                                                                                                                                                                          |
| 9  | EC-Earth3-CC     | Various           | European Earth System Model                                                                                                                                                                                            |
| 10 | EC-Earth3-Veg-LR | Various           | European Earth System Model                                                                                                                                                                                            |
| 11 | FGOALS-g3        | China             | Chinese Academy of Sciences                                                                                                                                                                                            |
| 12 | GFDL-ESM4        | USA               | NOAA Geophysical Fluid Dynamics Laboratory                                                                                                                                                                             |
| 13 | HadGEM3-GC31-LL  | UK                | Met. Office Hadley Centre                                                                                                                                                                                              |
| 14 | IITM-ESM         | India             | Centre for Climate Change Research, Indian Institute of Tropical Meteorology Pune                                                                                                                                      |
| 15 | INM-CM4-8        | Rusia             | Institute for Numerical Mathematics, Russian Academy of Science                                                                                                                                                        |
| 16 | INM-CM5-0        | Rusia             | Institute for Numerical Mathematics, Russian Academy of Science                                                                                                                                                        |
| 17 | IPSL-CM6A-LR     | France            | Institut Pierre-Simon Laplace                                                                                                                                                                                          |
| 18 | KACE-1-0-G       | Republic of Korea | National Institute of Meteorological Sciences/Korea Meteorological Administration, Climate Research Division                                                                                                           |
| 19 | MIROC6           | Japan             | Japan Agency for Marine-Earth Science and Technology (JAMSTEC), Atmosphere and Ocean Research Institute (AORI), National Institute for Environmental Studies (NIES) and RIKEN Center for Computational Science (R-CCS) |
| 20 | MIROC-ES2L       | Japan             | Japan Agency for Marine-Earth Science and Technology (JAMSTEC), Atmosphere and Ocean Research Institute (AORI), National Institute for Environmental Studies (NIES) and RIKEN Center for Computational Science (R-CCS) |
| 21 | MPI-ESM1-2-LR    | Germany           | Max Planck Institute for Meteorology                                                                                                                                                                                   |
| 22 | MRI-ESM2-0       | Japan             | Meteorological Research Institute                                                                                                                                                                                      |
| 23 | NESM3            | China             | Nanjing University of Information Science and Technology                                                                                                                                                               |
| 24 | NorESM2-MM       | Norway            | NorESM Climate modeling Consortium consisting of CICERO                                                                                                                                                                |
| 25 | UKESM1-0-LL      | UK                | Met Office Hadley Centre                                                                                                                                                                                               |

4

5

6 **Supplementary Table S2. Precipitation multi-model ensemble mean contribution by season in percentage for the five MEDClim**  
7 **regions for the historical period (1970-1999) and the future (2050-2079) scenarios ssp2-4.5 and ssp5-8.5.**

|     |            | Winter | Spring | Summer | Autumn |
|-----|------------|--------|--------|--------|--------|
| CAL | Historical | 47,6%  | 27,1%  | 6,7%   | 18,6%  |
|     | ssp2-4.5   | 49,8%  | 26,2%  | 6,5%   | 17,5%  |
|     | ssp5-8.5   | 50,7%  | 25,0%  | 6,8%   | 17,4%  |
| MED | Historical | 35,2%  | 24,7%  | 11,4%  | 28,7%  |
|     | ssp2-4.5   | 36,8%  | 24,6%  | 10,3%  | 28,3%  |
|     | ssp5-8.5   | 37,7%  | 24,4%  | 9,8%   | 28,2%  |
| SAA | Historical | 49,7%  | 19,7%  | 8,2%   | 22,4%  |
|     | ssp2-4.5   | 51,2%  | 19,0%  | 7,9%   | 21,9%  |
|     | ssp5-8.5   | 51,6%  | 18,4%  | 8,0%   | 21,9%  |
| SAF | Historical | 41,7%  | 20,9%  | 12,3%  | 25,1%  |
|     | ssp2-4.5   | 42,6%  | 20,2%  | 12,5%  | 24,8%  |
|     | ssp5-8.5   | 42,6%  | 19,8%  | 12,8%  | 24,8%  |
| AUS | Historical | 39,4%  | 16,5%  | 18,2%  | 25,9%  |
|     | ssp2-4.5   | 37,5%  | 15,4%  | 19,4%  | 27,7%  |
|     | ssp5-8.5   | 36,1%  | 14,4%  | 20,1%  | 29,4%  |

21

22 **Supplementary Table S3. Seasonal sum of precipitation (mm season<sup>-1</sup>) for the five MEDClim regions over the historical period (1970-**  
23 **1999) and the future (2050-2079) changes under ssp2-4.5 and ssp5-8.5 scenarios.**

|     |            | Winter<br>(mm season <sup>-1</sup> ) | Spring<br>(mm season <sup>-1</sup> ) | Summer<br>(mm season <sup>-1</sup> ) | Autumn<br>(mm season <sup>-1</sup> ) | Annual<br>(mm year <sup>-1</sup> ) |
|-----|------------|--------------------------------------|--------------------------------------|--------------------------------------|--------------------------------------|------------------------------------|
| CAL | Historical | 287.1                                | 163.4                                | 40.3                                 | 112.0                                | 602.8                              |
|     | ssp2-4.5   | +18.7                                | -2.2                                 | -0.4                                 | -4.6                                 | +11.5                              |
|     | ssp5-8.5   | +26.7                                | -8.7                                 | +1.9                                 | -4.4                                 | +15.5                              |
| MED | Historical | 163.2                                | 114.4                                | 52.9                                 | 132.9                                | 463.4                              |
|     | ssp2-4.5   | -1.9                                 | -6.7                                 | -7.8                                 | -9.1                                 | -25.5                              |
|     | ssp5-8.5   | -7.9                                 | -13.8                                | -12.6                                | -16.8                                | -51.1                              |
| SAA | Historical | 415.6                                | 164.2                                | 68.7                                 | 187.0                                | 835.5                              |
|     | ssp2-4.5   | -51.8                                | -29.1                                | -12.8                                | -31.1                                | -124.8                             |
|     | ssp5-8.5   | -77.6                                | -43.4                                | -16.5                                | -43.3                                | -180.8                             |
| SAF | Historical | 169.7                                | 85.0                                 | 50.1                                 | 102.0                                | 406.8                              |
|     | ssp2-4.5   | -19.1                                | -13.6                                | -5.8                                 | -14.4                                | -52.9                              |
|     | ssp5-8.5   | -25.8                                | -18                                  | -6.8                                 | -18.3                                | -68.9                              |
| AUS | Historical | 171.9                                | 71.9                                 | 79.5                                 | 113.2                                | 436.5                              |
|     | ssp2-4.5   | -26.0                                | -12.1                                | -3.8                                 | -5.2                                 | -47.1                              |
|     | ssp5-8.5   | -34.5                                | -17.0                                | -3.2                                 | -1.5                                 | -56.2                              |

24

25 **Supplementary Table S4. Precipitation multi-model ensemble mean changes (spatial ranges over the regions) in mm for mid-late**  
 26 **century (2050-2079) ssp5-8.5 future scenario with respect to the reference historical period (1970-1999) for the MEDClim regions**  
 27 **(CAL, MED, SAA, SAF and AUS) for each season and annual.**

|        | Winter       | Spring       | Summer      | Autumn      | Annual       |
|--------|--------------|--------------|-------------|-------------|--------------|
| 28 CAL | -2,6 – 21,3  | -9,4 – 5,3   | -3,6 – 3,8  | -7,5 – 2,5  | -1,0 – 5,8   |
| 29 MED | -16,2 – 10,8 | -17,0 – 5,3  | -14,5 – 0,6 | -22,5 – 0,4 | -12,0 – 1,0  |
| 30 SAA | -44,8 – -4,6 | -27,0 – -3,5 | -21,6 – 0,3 | -33,2 – 0,6 | -27,5 – -2,9 |
| 31 SAF | -11,5 – -6,1 | -7,9 – -2,9  | -4,9 – -0,6 | -7,7 – -3,0 | -7,1 – -3,5  |
| 32 AUS | -31,0 – -0,4 | -13,3 – -1,1 | -2,7 – 0,6  | -10,0 – 4,0 | -14,0 – 0,2  |

33

34 **Supplementary Table S5. Precipitation multi-model ensemble mean changes (spatial ranges over the regions) in mm for mid-late**  
 35 **century (2050-2079) ssp2-4.5 future scenario with respect to the reference historical period (1970-1999) for the MEDClim regions**  
 36 **(CAL, MED, SAA, SAF and AUS) for each season and annual.**

|        | Winter       | Spring       | Summer      | Autumn       | Annual       |
|--------|--------------|--------------|-------------|--------------|--------------|
| 38 CAL | -1,3 – 15,3  | -4,4 – 6,4   | -3,2 – 1,2  | -4,5 – 1,9   | -1,4 – 4,2   |
| 39 MED | -12,2 – 11,9 | -10,7 – 7,1  | -9,9 – 0,5  | -11,9 – 3,5  | -7,6 – 4,6   |
| 40 SAA | -29,9 – -4,3 | -16,9 – -2,6 | -15,8 – 0,2 | -22,5 – -0,4 | -18,0 – -2,9 |
| 41 SAF | -8,5 – -4,5  | -5,8 – -2,2  | -4,2 – -0,7 | -6,3 – -2,5  | -5,3 – -2,7  |
| 42 AUS | -22,0 – -1,7 | -9,3 – -0,7  | -2,3 – -0,3 | -6,7 – 2,8   | -9,7 – -0,4  |

43

44

45

46

47

48

49

50

51

52

53

54

55

56

57

58

59

60

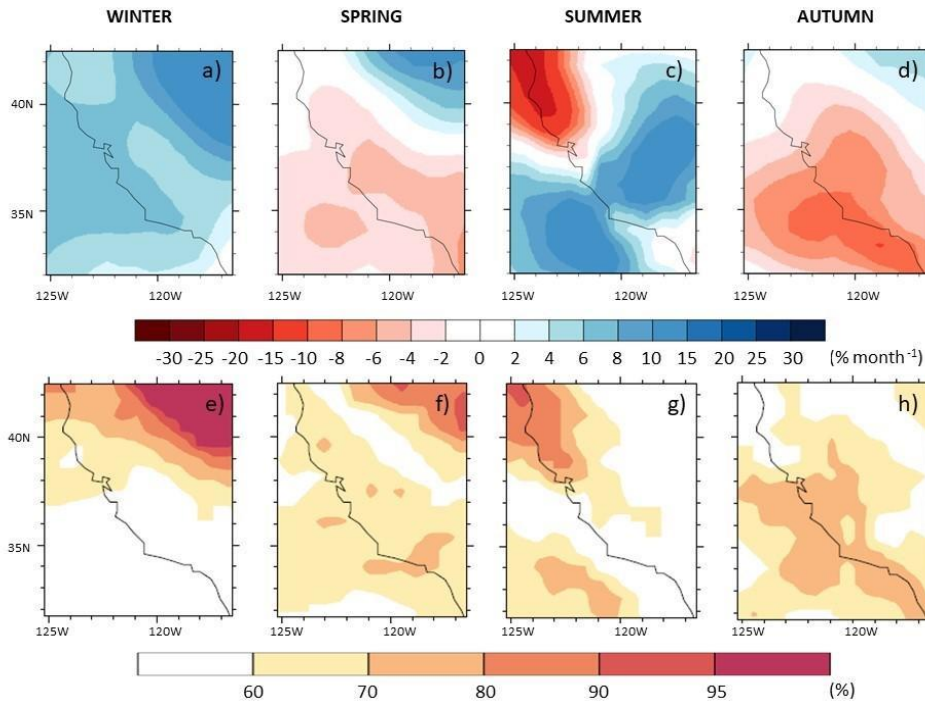

61

62 **Supplementary Figure S1. Future seasonal (winter – DJF, spring - MAM, summer – JJA and autumn – SON) precipitation anomalies**  
 63 **expressed in % and model agreement for California (CAL) based on the CMIP6 multi-model ensemble mean changes for mid-late**  
 64 **century (2050-2079) ssp2-4.5 future scenario; (a-d): seasonal ensemble mean changes; (e-h): percentage of models agreeing on the**  
 65 **same sign of future precipitation changes.**

66

67

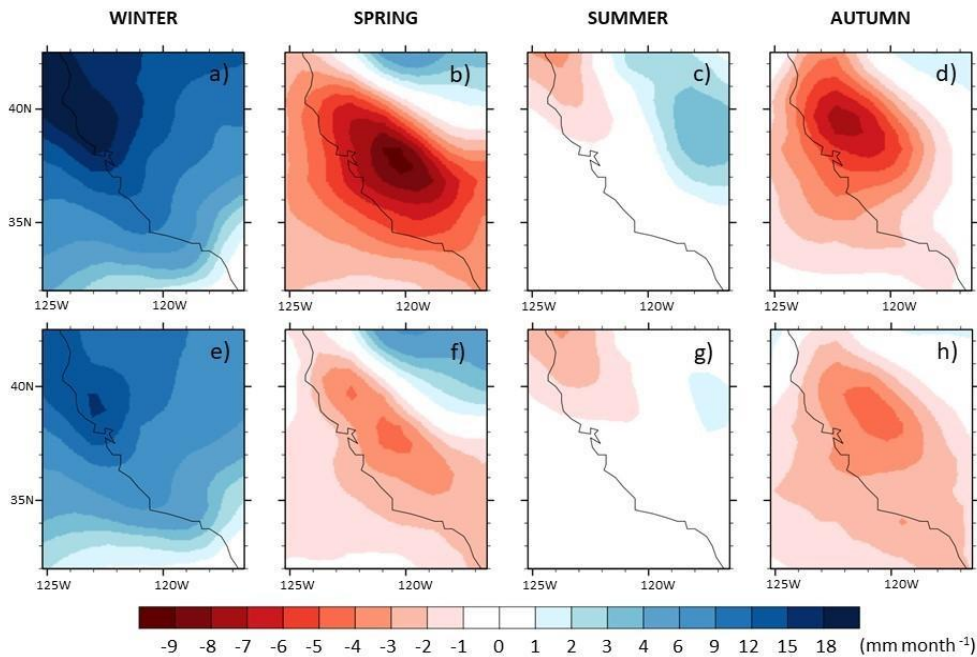

68

69 **Supplementary Figure S2. Future seasonal (winter – DJF, spring - MAM, summer – JJA and autumn – SON) precipitation anomalies**  
 70 **expressed in mm for California (CAL) based on the CMIP6 multi-model ensemble mean changes for mid-late century (2050-2079);**  
 71 **(a-d): ssp5-8.5 future scenario; (e-h): ssp2-4.5 future scenario.**

72

73

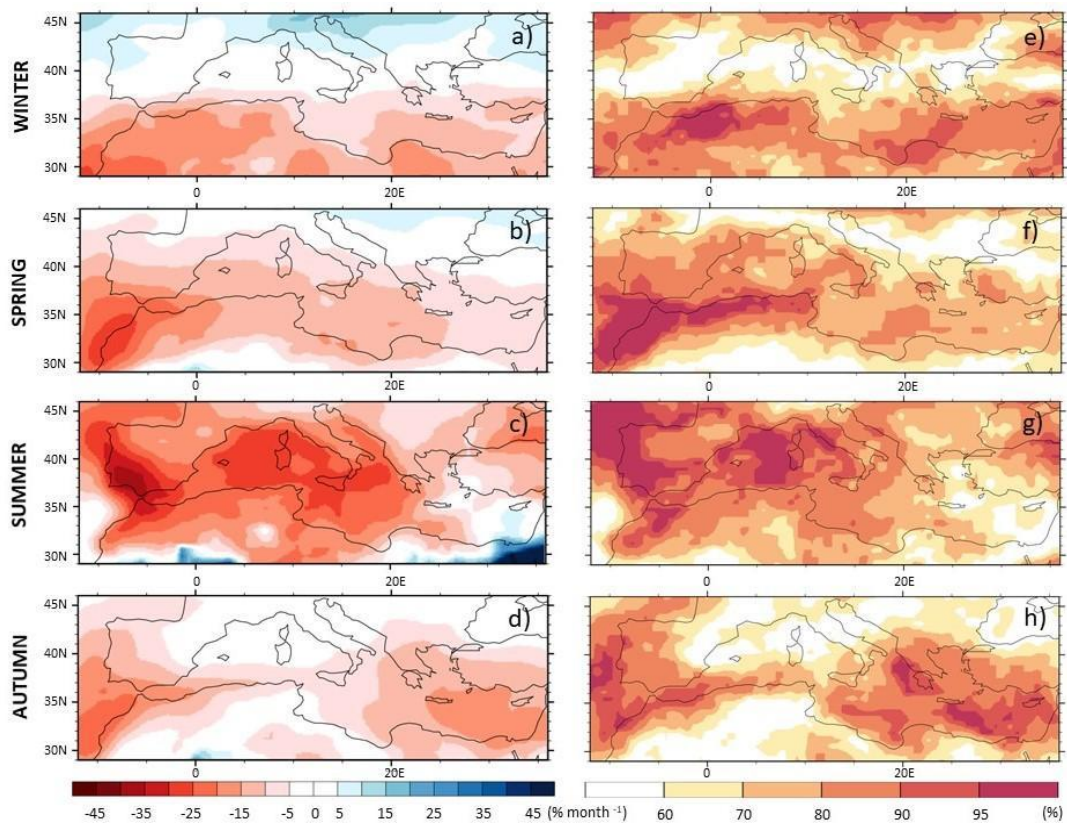

74

75 **Supplementary Figure S3.** Future seasonal (winter – DJF, spring - MAM, summer – JJA and autumn – SON) precipitation anomalies  
 76 expressed in % and model agreement for Mediterranean Basin (MED) based on the CMIP6 multi-model ensemble mean changes  
 77 for mid-late century (2050-2079) ssp2-4.5 future scenario; (a-d): seasonal ensemble mean changes; (e-h): percentage of models  
 78 agreeing on the same sign of future precipitation changes.

79

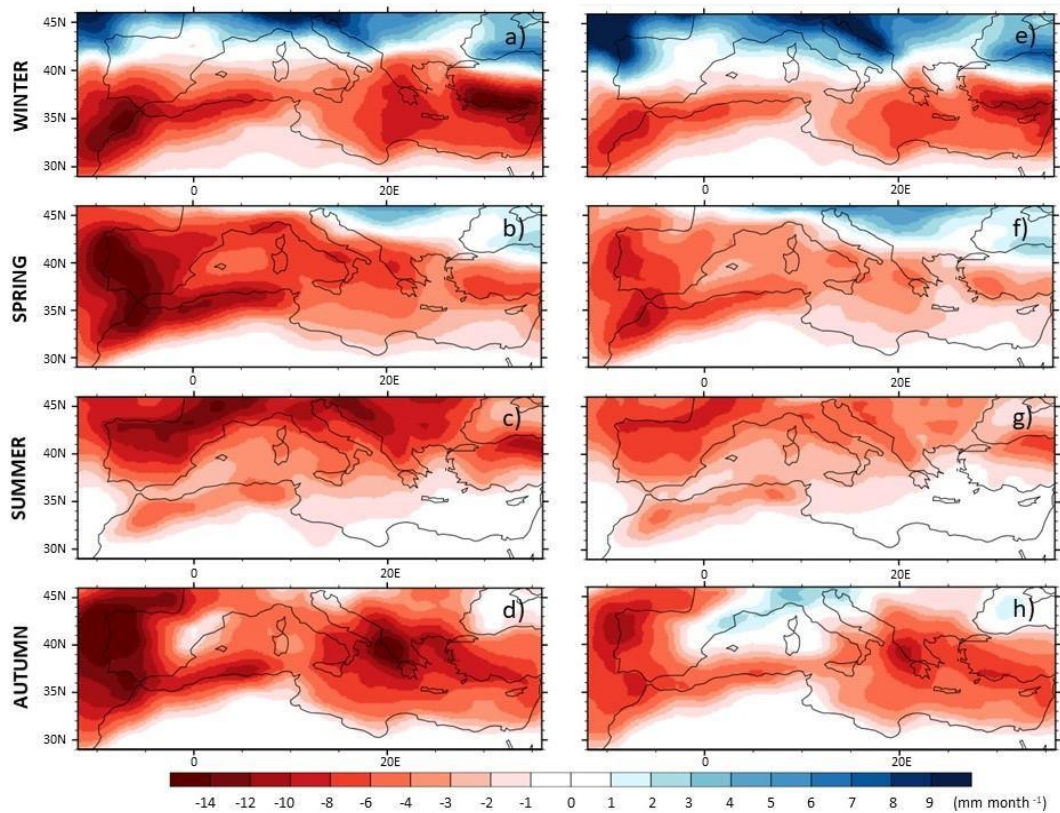

80

81 **Supplementary Figure S4.** Future seasonal (winter – DJF, spring - MAM, summer – JJA and autumn – SON) precipitation anomalies  
 82 expressed in mm for Mediterranean Basin (MED) based on the CMIP6 multi-model ensemble mean changes for mid-late century  
 83 (2050-2079); (a-d): ssp5-8.5 future scenario; (e-h): ssp2-4.5 future scenario.



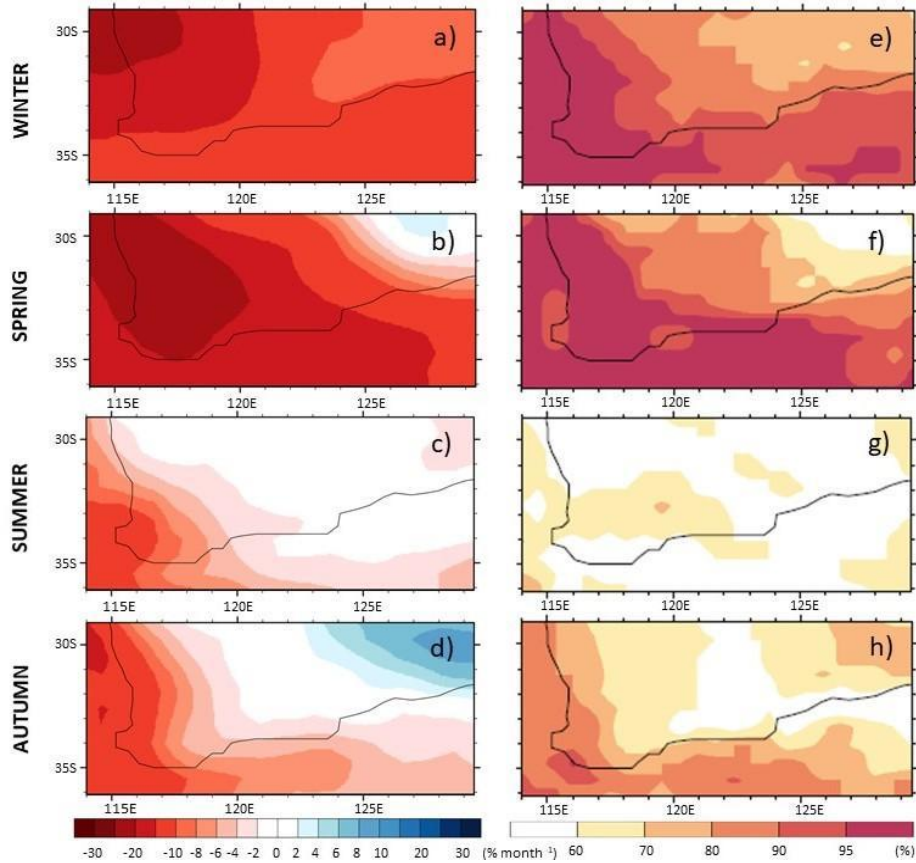

85

86 **Supplementary Figure S5. Future seasonal (winter – JJA, spring - SON, summer –DJF and autumn – MAM precipitation anomalies**  
 87 **expressed in % and model agreement for Australia (AUS) based on the CMIP6 multi-model ensemble mean changes for mid-late**  
 88 **century (2050-2079) ssp2-4.5 future scenario; (a-d): seasonal ensemble mean changes; (e-h): percentage of models agreeing on the**  
 89 **same sign of future precipitation changes.**

90

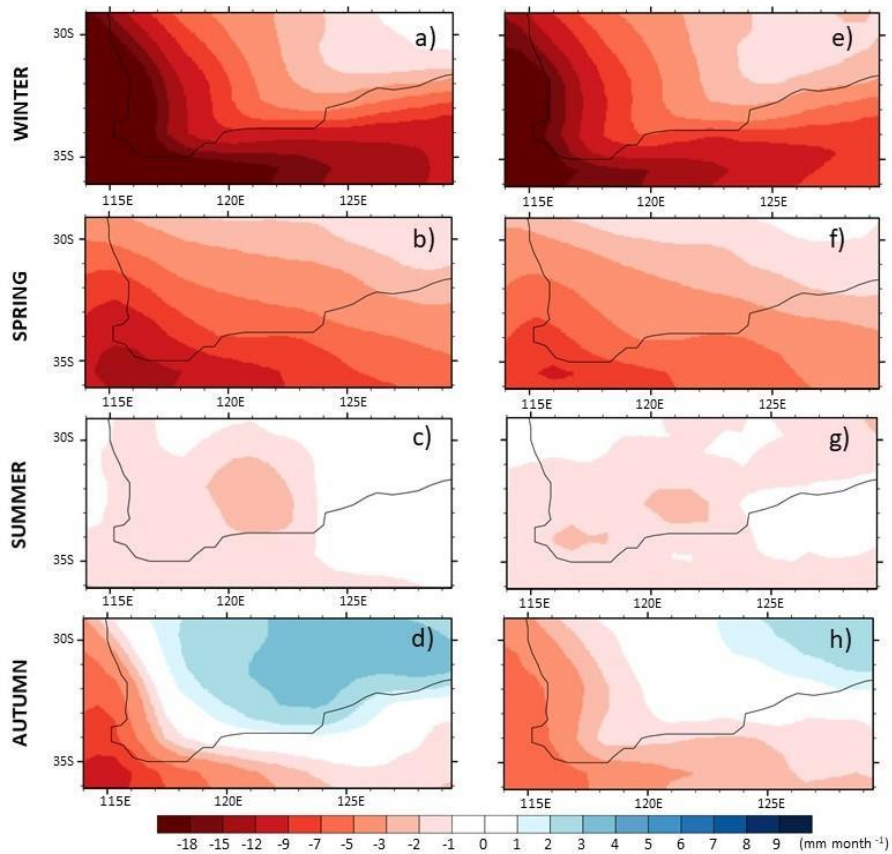

91

92 **Supplementary Figure S6. Future seasonal (winter – JJA, spring - SON, summer – DJF and autumn – MAM) precipitation anomalies**  
93 **expressed in mm for Australia (AUS) based on the CMIP6 multi-model ensemble mean changes for mid-late century (2050-2079);**  
94 **(a-d): ssp5-8.5 future scenario; (e-h): ssp2-4.5 future scenario.**

95

96

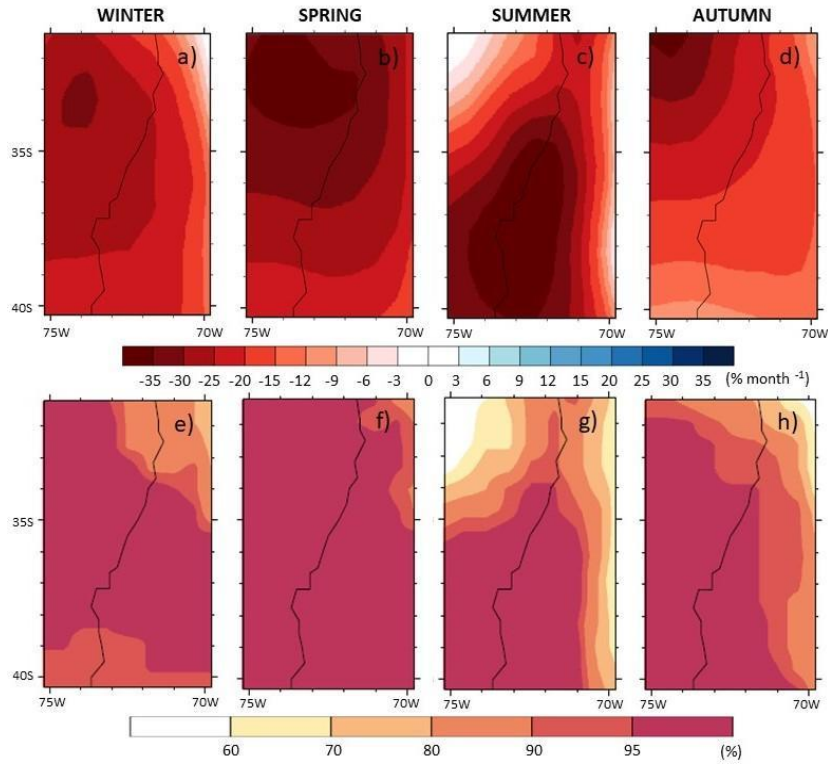

97

98 **Supplementary Figure S7. Future seasonal (winter – JJA, spring - SON, summer – DJF and autumn – MAM) precipitation anomalies**  
99 **expressed in % and model agreement for South America (SAA) based on the CMIP6 multi-model ensemble mean changes for mid-**  
100 **late century (2050-2079) ssp5-8.5 future scenario; (a-d): seasonal ensemble mean changes; (e-h): percentage of models agreeing on**  
101 **the same sign of future precipitation changes.**

102

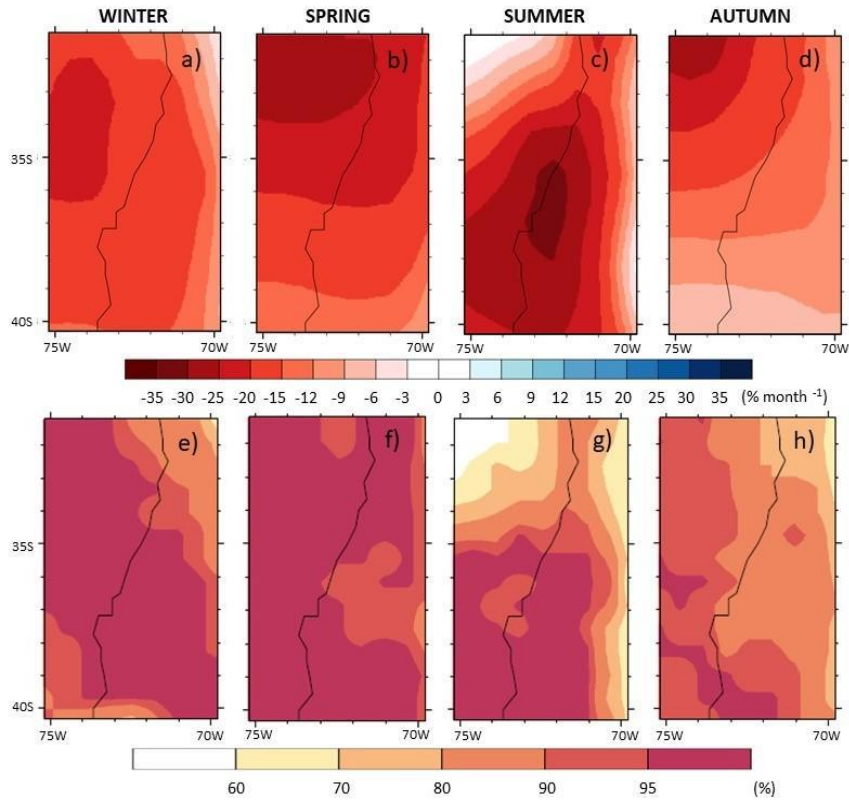

103

104 **Supplementary Figure S8. Future seasonal (winter – JJA, spring - SON, summer – DJF and autumn – MAM) precipitation anomalies**  
 105 **expressed in % and model agreement for South America (SAA) based on the CMIP6 multi-model ensemble mean changes for mid-**  
 106 **late century (2050-2079) ssp2-4.5 future scenario; (a-d): seasonal ensemble mean changes; (e-h): percentage of models agreeing on**  
 107 **the same sign of future precipitation changes.**

108

109

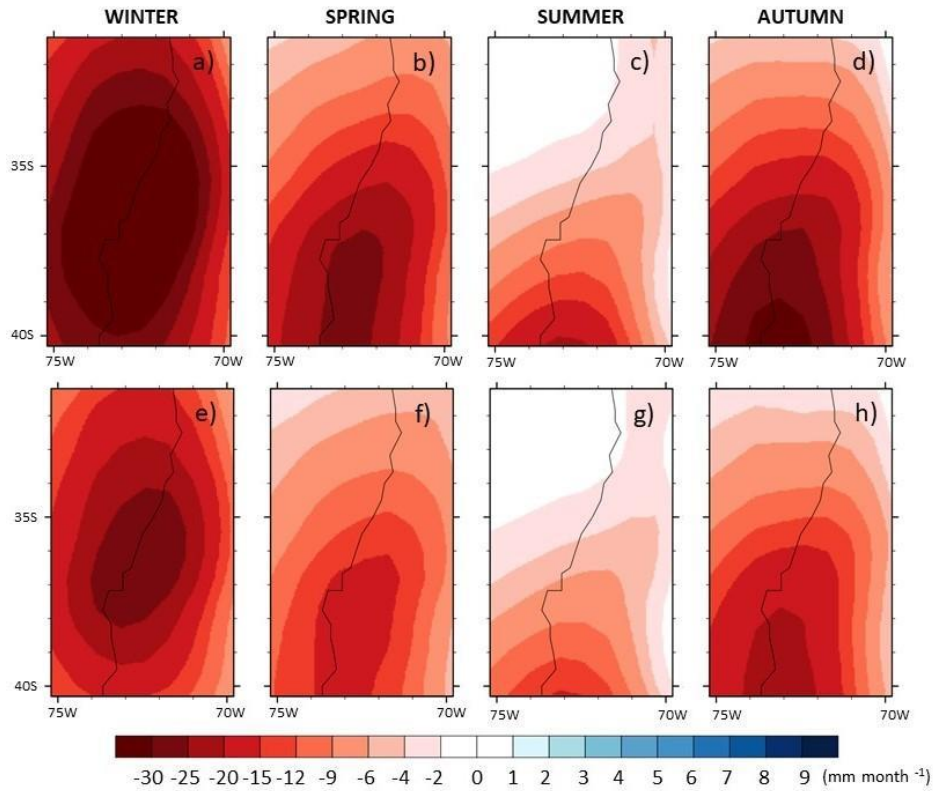

110

111 **Supplementary Figure S9. Future seasonal (winter – DJF, spring - MAM, summer – JJA and autumn – SON) precipitation anomalies**  
 112 **expressed in mm for South America (SAA) based on the CMIP6 multi-model ensemble mean changes for mid-late century (2050-**  
 113 **2079); (a-d): ssp5-8.5 future scenario; (e-h): ssp2-4.5 future scenario.**



114

115

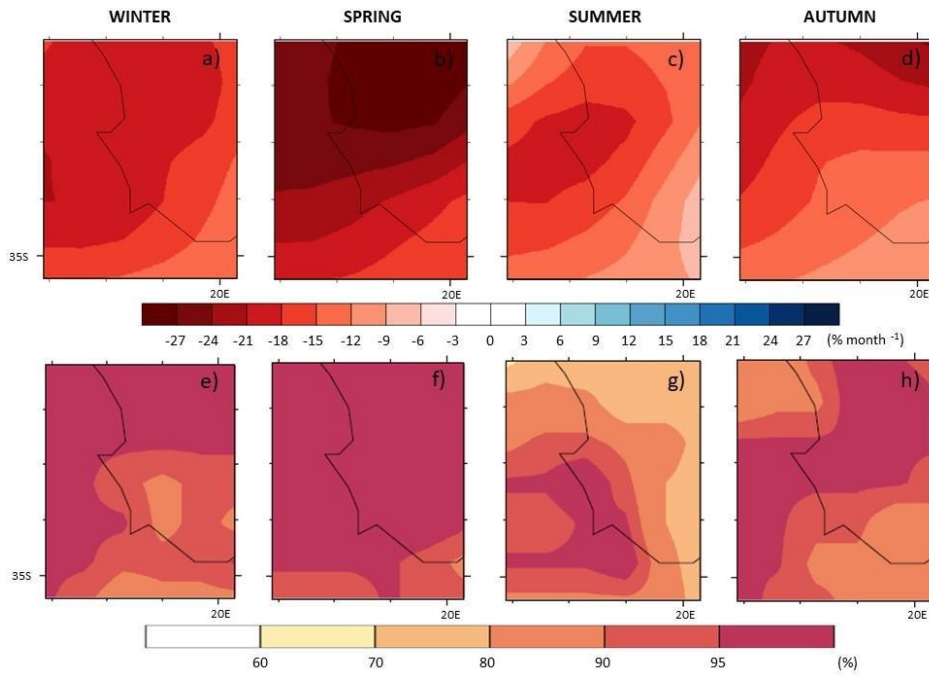

116

117 **Supplementary Figure S10. Future seasonal (winter – JJA, spring - SON, summer – DJF and autumn – MAM) precipitation**  
118 **anomalies expressed in % and model agreement for South Africa (SAF) based on the CMIP6 multi-model ensemble mean changes**  
119 **for mid-late century (2050-2079) ssp5-8.5 future scenario; (a-d): seasonal ensemble mean changes; (e-h): percentage of models**  
120 **agreeing on the same sign of future precipitation changes.**

121

122

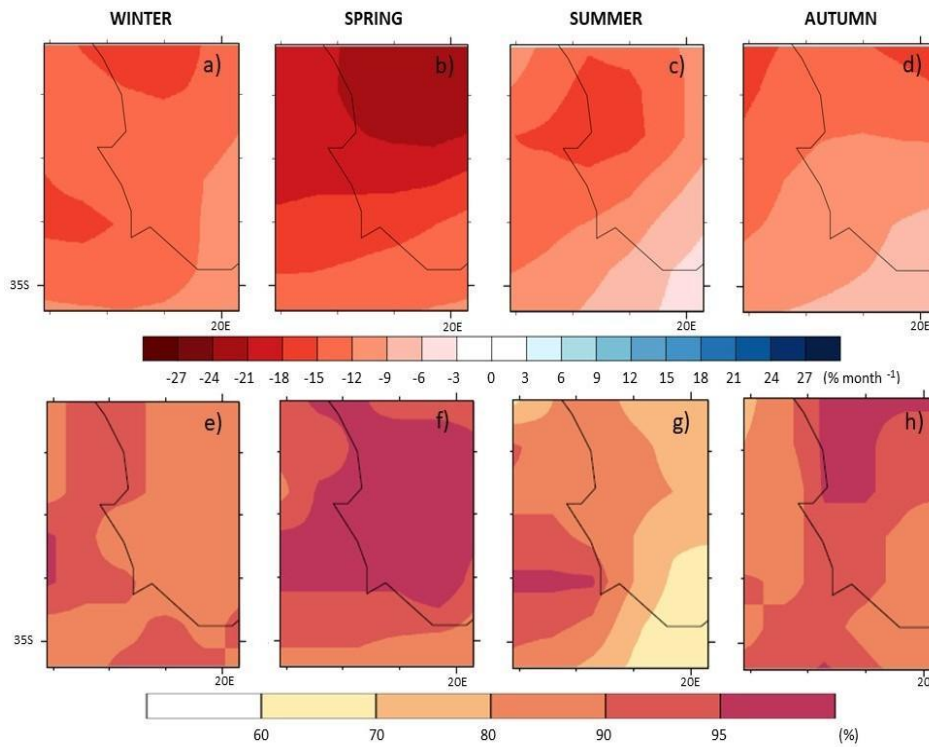

123

124 **Supplementary Figure S11. Future seasonal (winter – JJA, spring - SON, summer – DJF and autumn – MAM) precipitation**  
125 **anomalies expressed in % and model agreement for South Africa (SAF) based on the CMIP6 multi-model ensemble mean changes**  
126 **for mid-late century (2050-2079) ssp2-4.5 future scenario; (a-d): seasonal ensemble mean changes; (e-h): percentage of models**  
127 **agreeing on the same sign of future precipitation changes.**

128

129

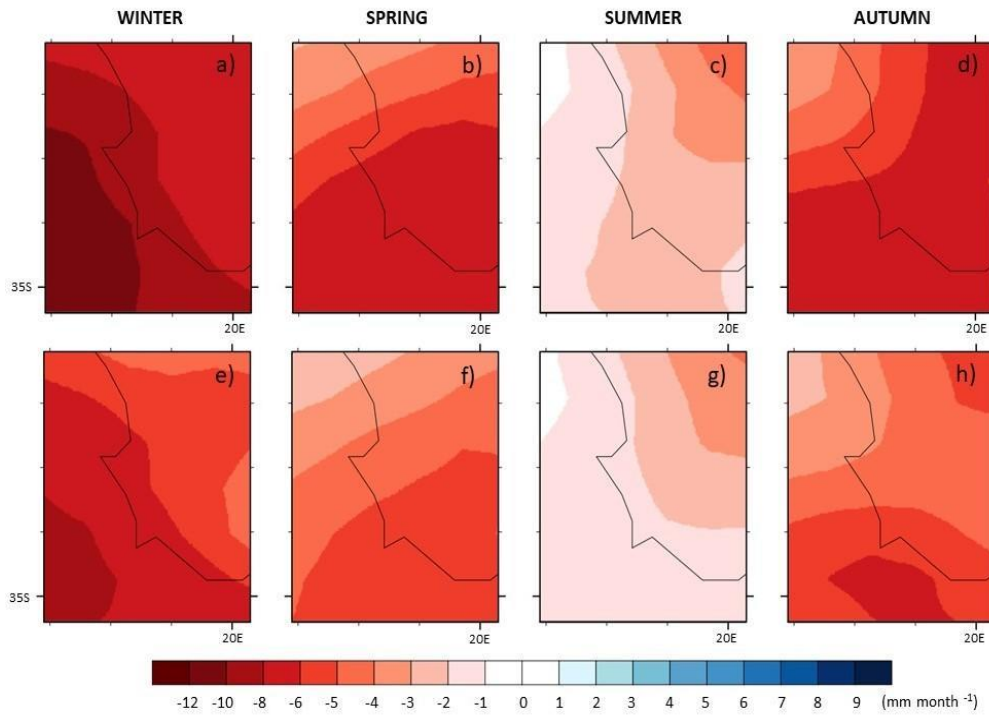

130

131 **Supplementary Figure S12. Future seasonal (winter – JJA, spring - SON, summer – DJF and autumn – MAM) precipitation**  
 132 **anomalies expressed in mm for South Africa (SAF) based on the CMIP6 multi-model ensemble mean changes for mid-late century**  
 133 **(2050-2079); (a-d): ssp5-8.5 future scenario; (e-h): ssp2-4.5 future scenario.**

134

135

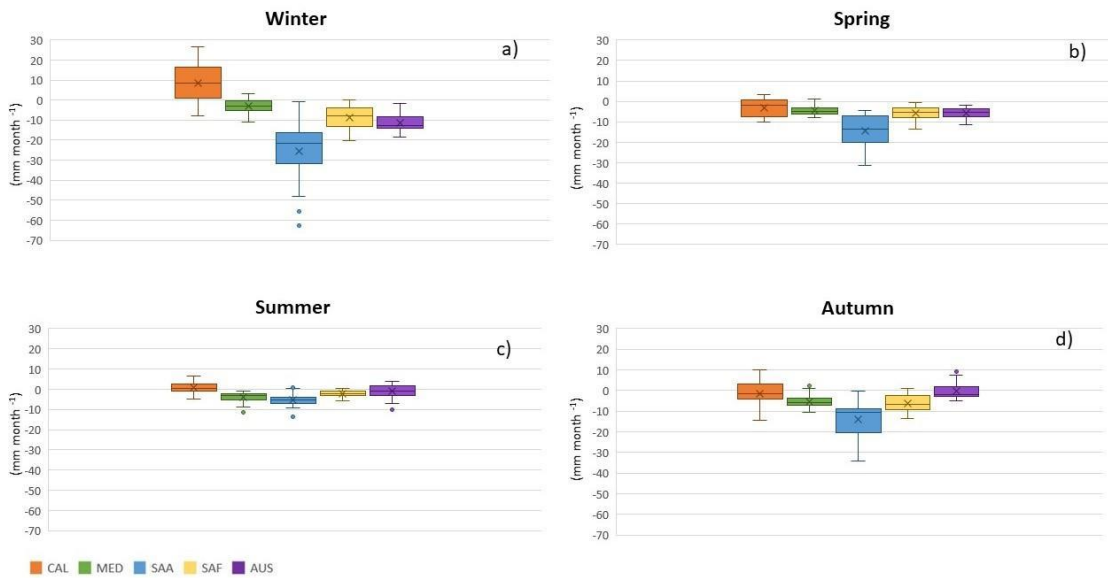

136

137 **Supplementary Figure S13. Box and whiskers plots showing the seasonal precipitation changes in mm month<sup>-1</sup> for mid-late century**  
 138 **(2050-2079) for ssp5-8.5 scenario over the five MedClim regions in the CMIP6 ensemble. Boxes indicate 25 to 75 percentile**  
 139 **interquartile range (IQR) and whiskers minimum and maximum values (values lower (higher) than 1.5xIQR below (above) the 1st**  
 140 **(3rd) quartile are shown by dots), ensemble means are indicated by crosses.**

141

142

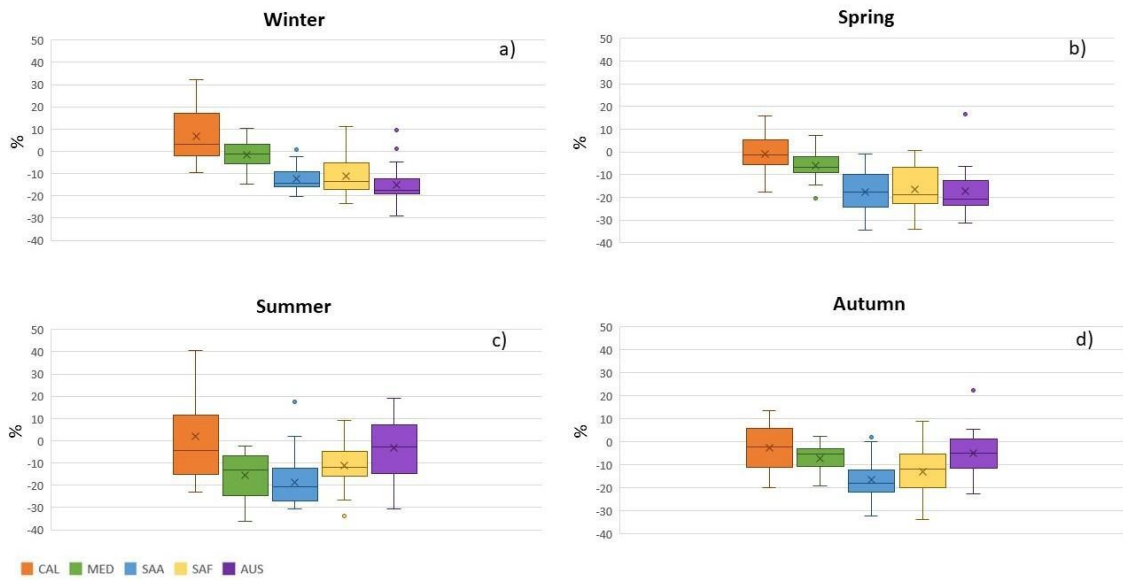

143

144 **Supplementary Figure S14.** Box and whiskers plots showing the seasonal precipitation percentage changes for mid-late century  
 145 (2050-2079) for ssp2-4.5 scenario over the five MedClim regions in the CMIP6 ensemble. Boxes indicate 25 to 75 percentile  
 146 interquartile range (IQR) and whiskers minimum and maximum values (values lower (higher) than 1.5xIQR below (above) the 1st  
 147 (3rd) quartile are shown by dots), ensemble means are indicated by crosses.

148

149

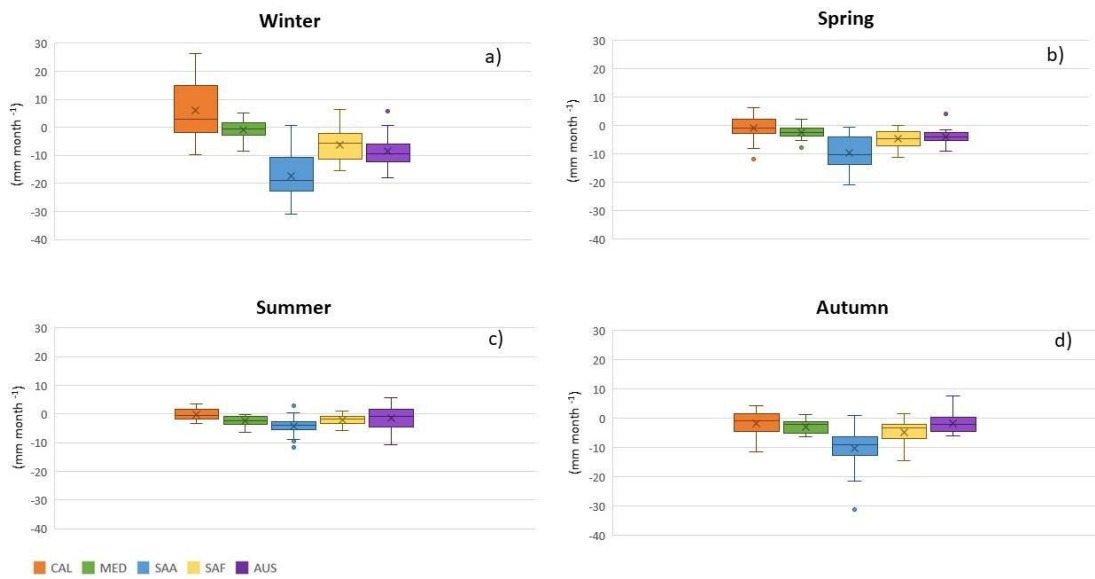

150

151 **Supplementary Figure S15.** Box and whiskers plots showing the seasonal precipitation changes in  $\text{mm month}^{-1}$  for mid-late century  
 152 (2050-2079) for ssp2-4.5 scenario over the five MedClim regions in the CMIP6 ensemble. Boxes indicate 25 to 75 percentile  
 153 interquartile range (IQR) and whiskers minimum and maximum values (values lower (higher) than 1.5xIQR below (above) the 1st  
 154 (3rd) quartile are shown by dots), ensemble means are indicated by crosses.

155

156

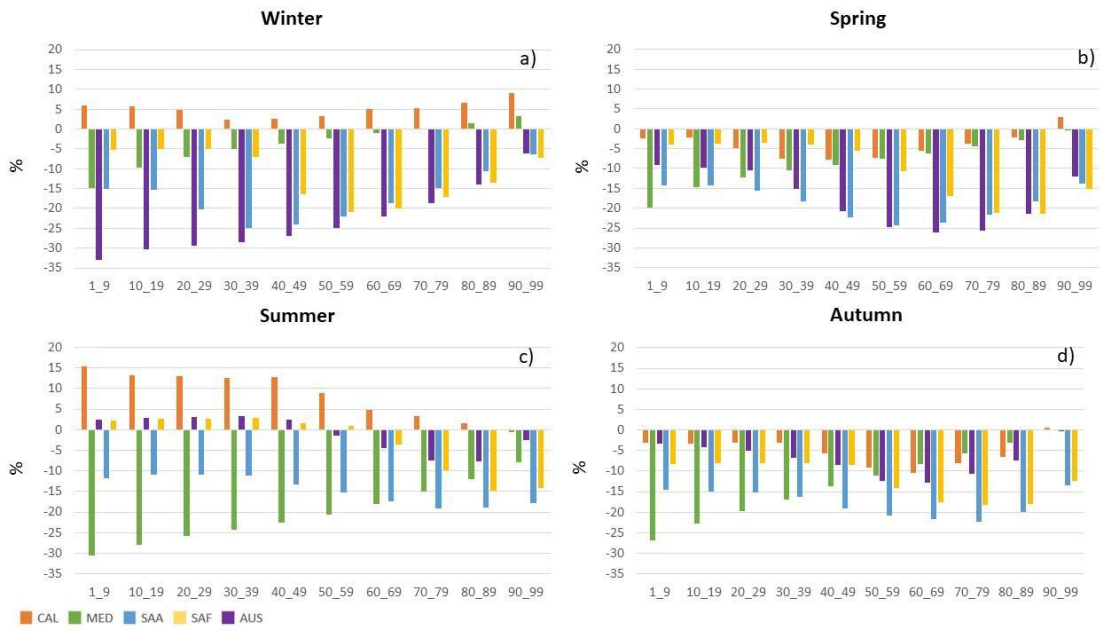

157

158

159

**Supplementary Figure 16. Precipitation percentiles, 1st to 99th, by range for the five MEDClim regions for the historical period (1970-1999), and the future (2050-2079) period under ssp2-4.5 scenarios for winter (a), spring (b), summer (c) and autumn (d).**

160



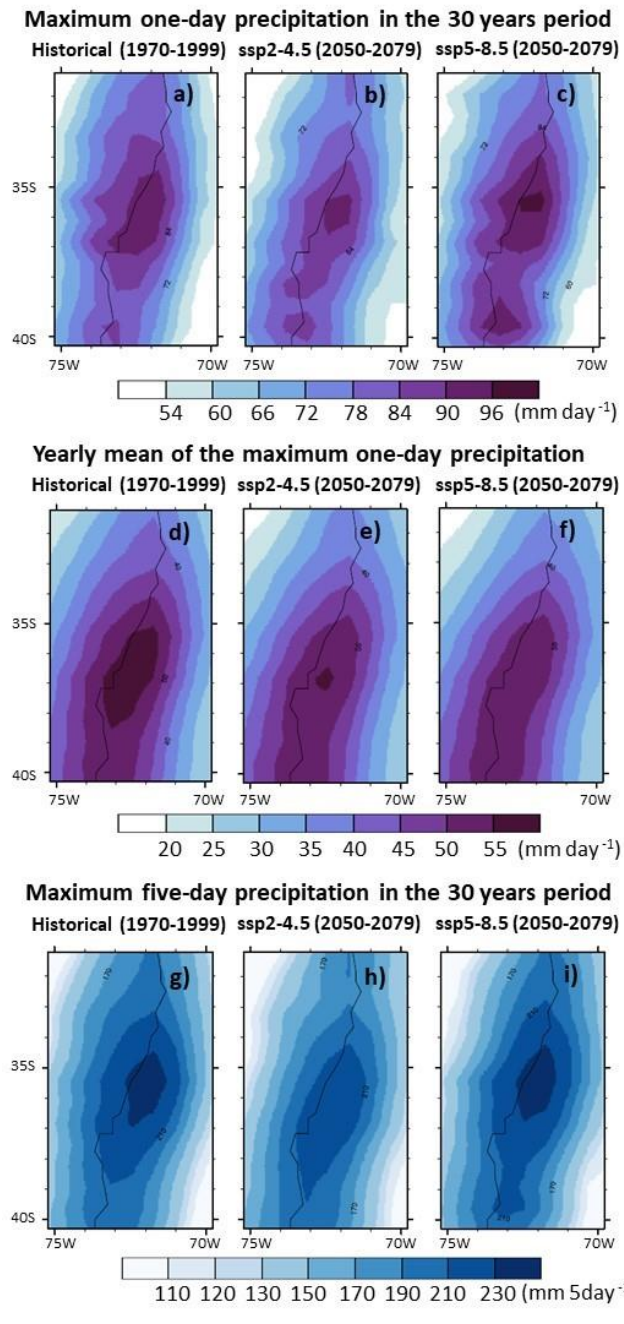

161

162 **Supplementary Figure S17. Maximum precipitation day ( $\text{mm day}^{-1}$ ) over SAA for the 30-year periods: historical (1970-1999) (a)**  
 163 **and future (2050-2079) ssp2-4.5 (b) and ssp5-8.5 (c). And ensemble mean of the maximum precipitation day ( $\text{mm day}^{-1}$ ) in every**  
 164 **year over the 30-year period for historical (d) and future ssp2-4.5 (e) and ssp5-8.5 (f) scenarios. And maximum precipitation during**  
 165 **5 days ( $\text{mm 5day}^{-1}$ ) for the 30-year periods: historical (g) and future ssp2-4.5 (h) and ssp5-8.5 (i) scenarios.**

166

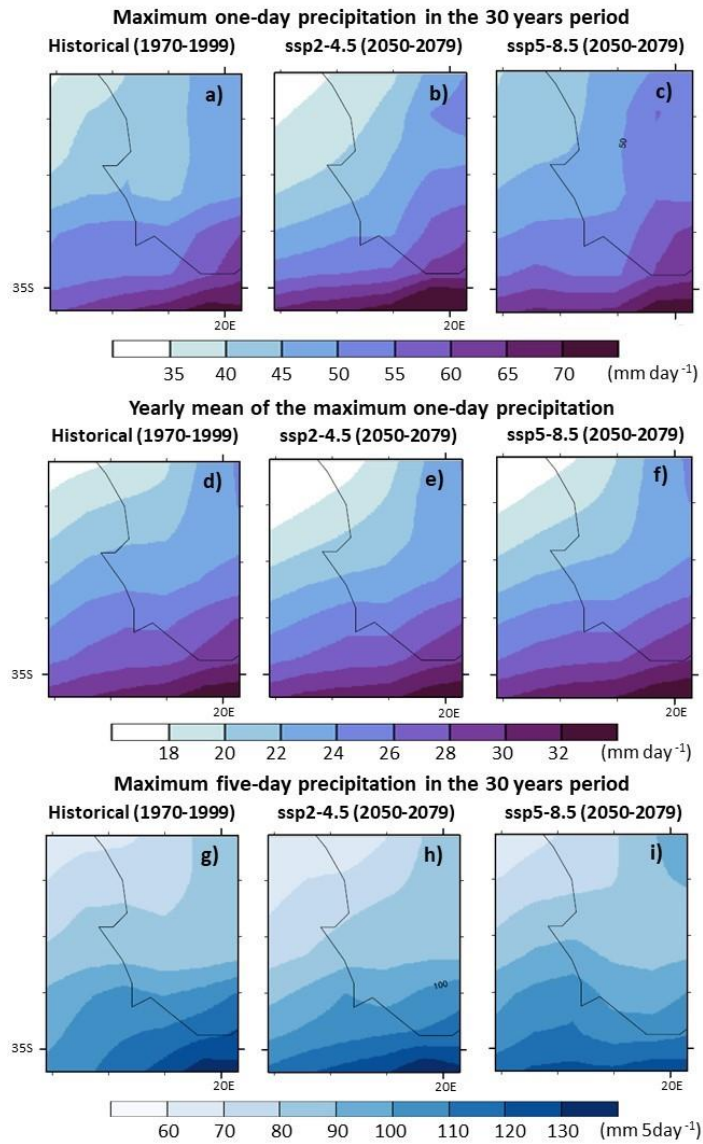

167

168 **Supplementary Figure 18. Maximum precipitation day ( $\text{mm day}^{-1}$ ) over SAF for the 30-year periods: historical (1970-1999) (a) and**  
 169 **future (2050-2079) ssp2-4.5 (b) and ssp5-8.5 (c) scenarios. And ensemble mean of the maximum precipitation day ( $\text{mm/day}$ ) in every**  
 170 **year over the 30-year period for historical (d) and future ssp2-4.5 (e) and ssp5-8.5 (f) scenarios. And maximum precipitation during**  
 171 **5 days ( $\text{mm 5day}^{-1}$ ) for the 30-year periods: historical (g) and future ssp2-4.5 (h) and ssp5-8.5 (i) scenarios.**

172

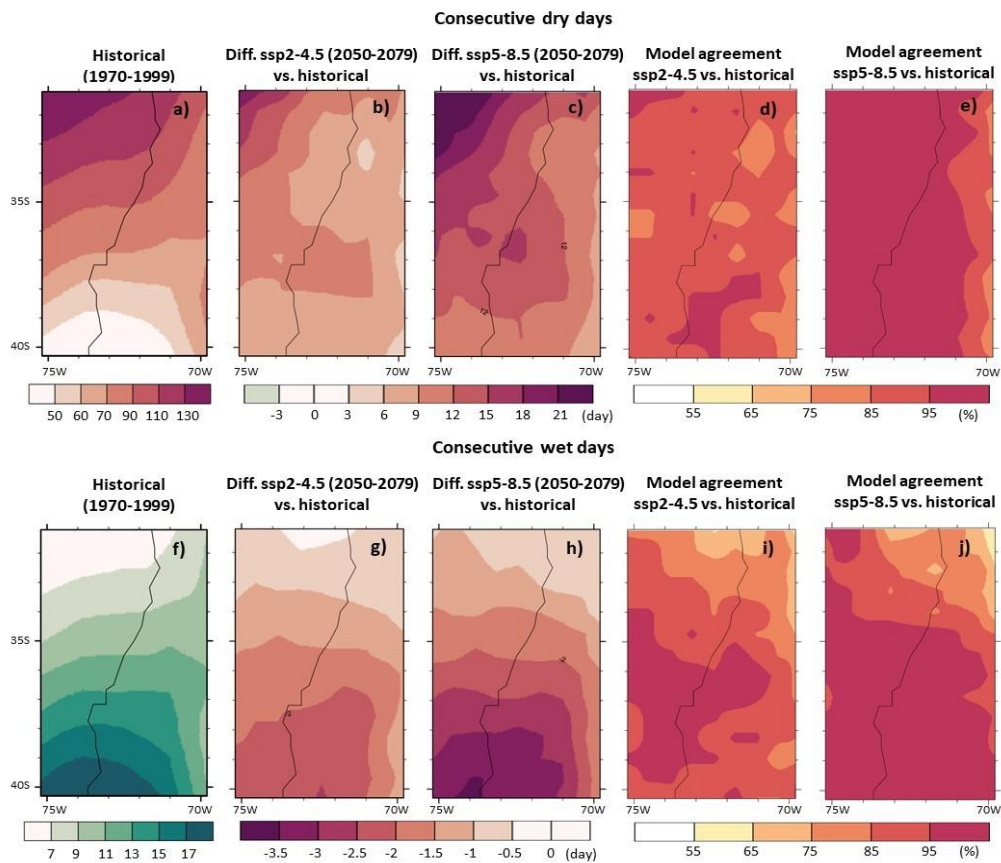

173

174 **Supplementary Figure S19. Ensemble mean of annual consecutive dry days (CDD) for historical period (1970-1999) (a) and**  
 175 **differences between historical and mid-late century (2050-2079) for ssp2-4.5 (b) and ssp5-8.5 (c) scenarios. And ensemble mean of**  
 176 **annual consecutive wet days (CWD) for historical period (1970-1999) (d) and differences between historical and mid-late century**  
 177 **(2050-2079) for ssp2-4.5 (e) and ssp5-8.5 (f) scenarios over South America (SAA). And model agreement in percentage on the same**  
 178 **sign of future precipitation changes for ssp2-4.5 (d) and (i) and ssp5-8.5 (e) and (j) scenarios.**

179

180

181

182

183

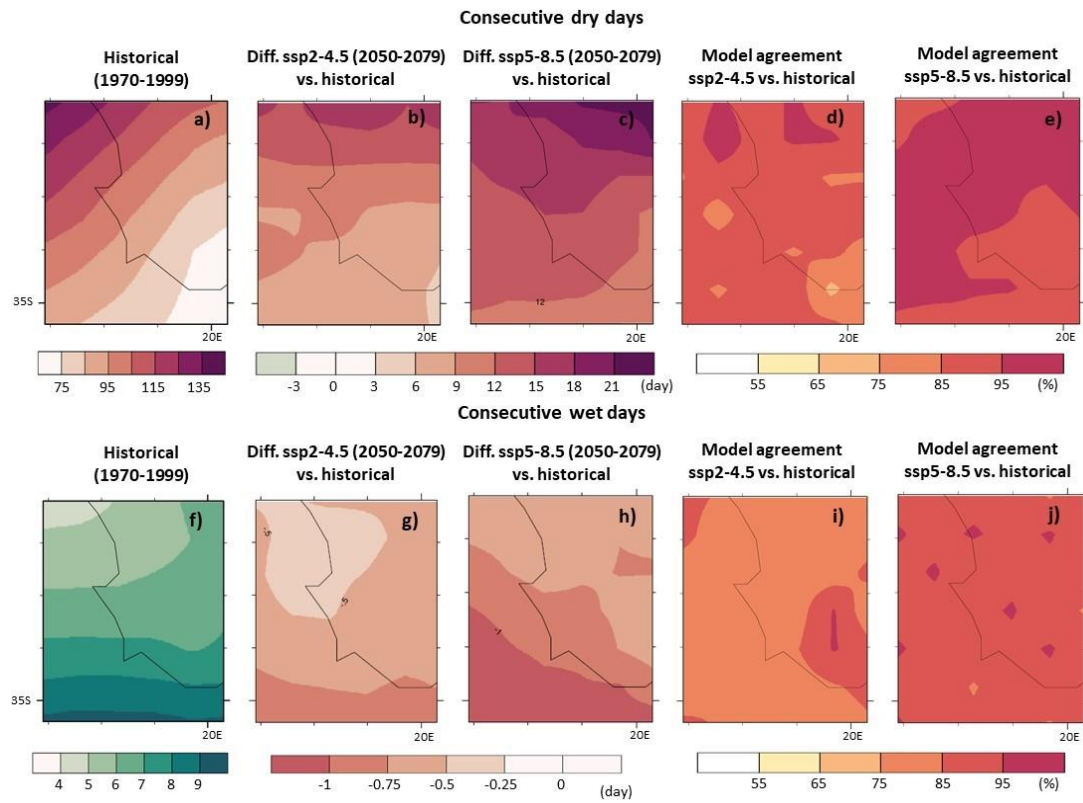

184

185 **Supplementary Figure S20. Ensemble mean of annual consecutive dry days (CDD) for historical period (1970-1999) (a) and**  
 186 **differences between historical and mid-late century (2050-2079) for ssp2-4.5 (b) and ssp5-8.5 (c) scenarios. And ensemble mean of**  
 187 **annual consecutive wet days (CWD) for historical period (1970-1999) (d) and differences between historical and mid-late century**  
 188 **(2050-2079) for ssp2-4.5 (e) and ssp5-8.5 (f) scenarios over South Africa (SAF). And model agreement in percentage on the same sign**  
 189 **of future precipitation changes for ssp2-4.5 (d) and (i) and ssp5-8.5 (e) and (j) scenarios.**

190
